# Supplementary material for: Foliar Selenium Application to Reduce the Induced-Drought Stress Effects in Coffee Seedlings: Induced Priming or Alleviation Effect?
Source: MDPI journal article supplement (doi:10.3390/plants12173026), 2023-08-23

## Supplementary material

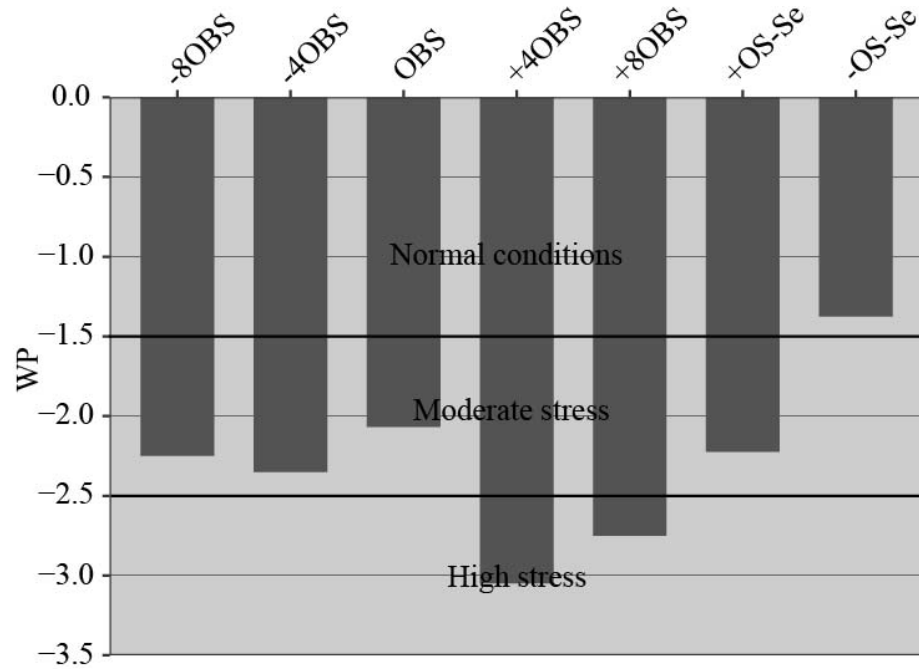

Supplementary Figure S1: Water potential of coffee leaves as a result of Se application in *C. arabica* cv. Catuai seedlings under osmotic stress induced by PEG-6000. The values displayed are the distribution of four replicates. Treatments: -8BOS - Application of Se 8 days before stress (Stressed plants); -4BOS - Application of Se 4 days before stress (Stressed plants); 0OS - Application of Se on the day of stress occurrence (Stressed plants); +4AOS - Application of Se 4 days after stress (Stressed plants); +8AOS - Application of Se 8 days after stress (Stressed plants); +OS-Se - Without Se (Stressed plants); -OS-Se - Without Se (Non-stressed plants).

## Running Title

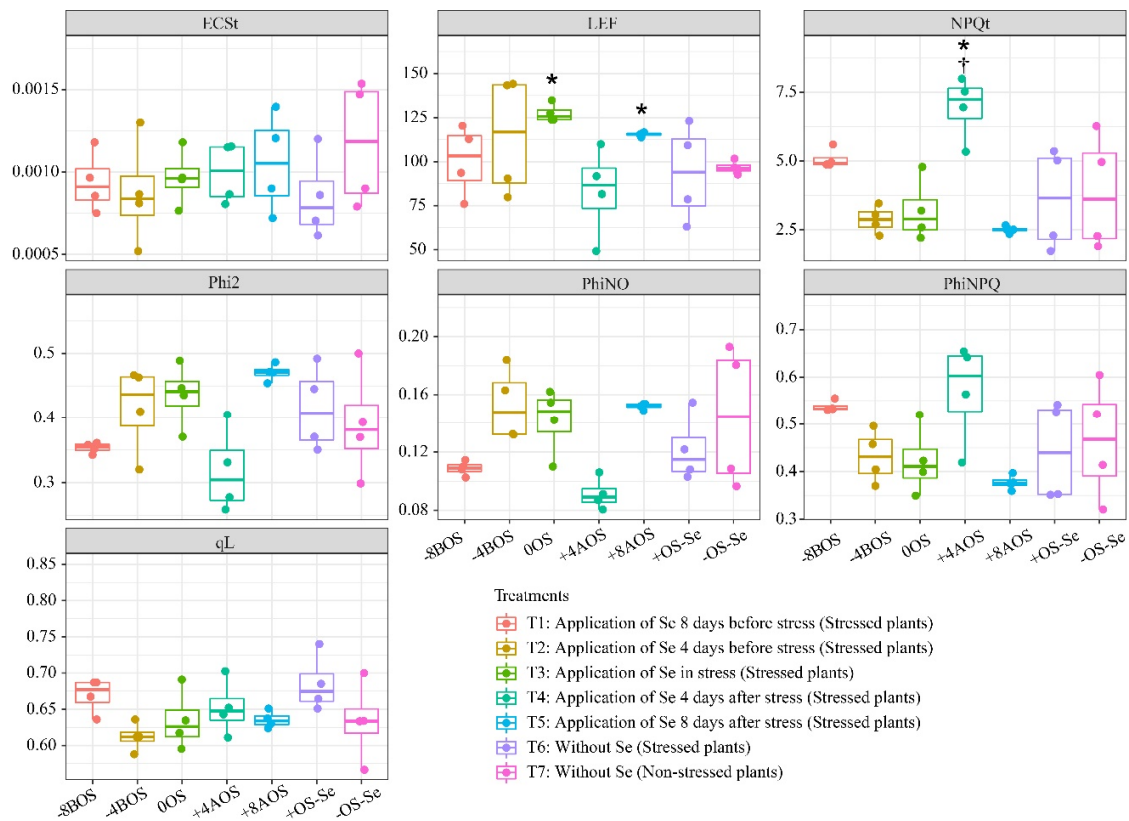

Supplementary Figure S2: Total electrochromic shift (ECSt), total flow of electrons (LEF), total flow of electrons (NPQt), quantum yield of PSII (Phi2), quantum yield of non-regulated energy loss in PSII (PhiNO), quantum yield of regulated non-photochemical energy loss in PSII (PhiNPQ), and fraction of PSII centers which are in the open state (qL) as a result of Se application in *C. arabica* cv. Catuai seedlings under osmotic stress induced by PEG-6000. The values displayed are the distribution of four replicates. Asterisks refer to the significant difference when comparing all treatments with non-stressed plants without Se supply (-OS-Se) ( $p < 0.05$ ). Dagger refers to the significant difference when comparing all treatments with stressed plants without Se supply (+OS-Se) ( $p < 0.05$ ). Treatments: -8BOS - Application of Se 8 days before stress (Stressed plants); -4BOS - Application of Se 4 days before stress (Stressed plants); 0OS - Application of Se on the day of stress occurrence (Stressed plants); +4AOS - Application of Se 4 days after stress (Stressed plants); +8AOS - Application of Se 8 days after stress (Stressed plants); +OS-Se - Without Se (Stressed plants); -OS-Se - Without Se (Non-stressed plants).

## Running Title

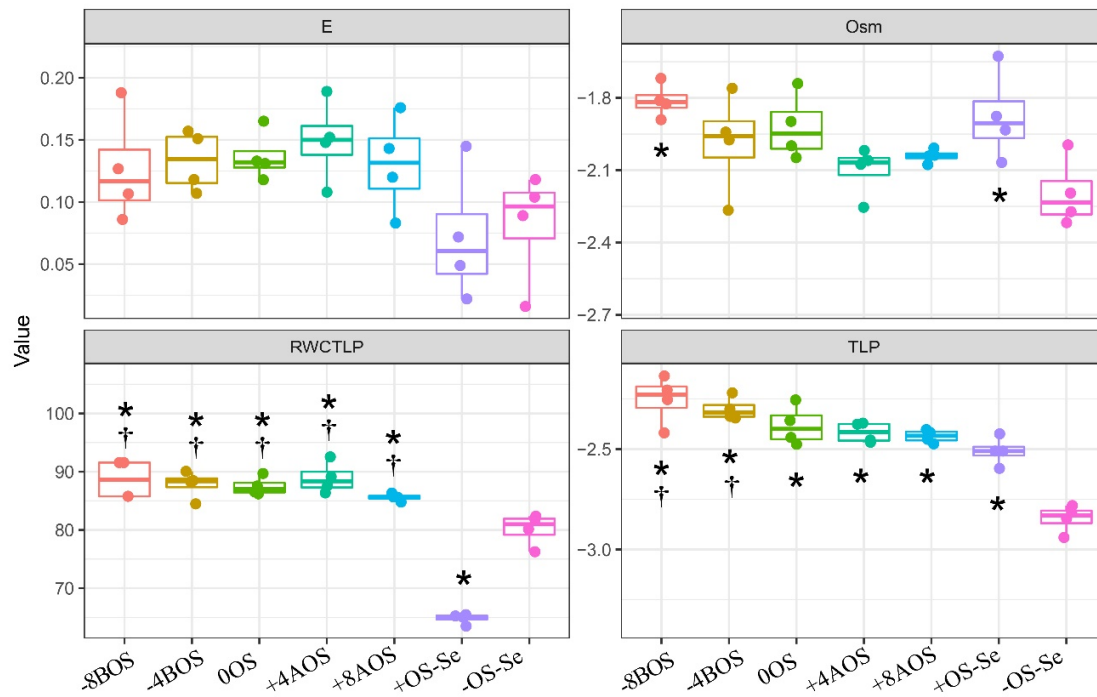

Supplementary Figure S3: Elasticity (E), Osmotic potential (Osm), Relative water content at turgor loss point ( $RWC_{TLP}$ ), and turgor loss point (TLP) of coffee leaves as a result of Se application in *C. arabica* cv. Catuai seedlings under osmotic stress induced by PEG-6000. The values displayed are the distribution of four replicates. Treatments: -8BOS - Application of Se 8 days before stress (Stressed plants); -4BOS - Application of Se 4 days before stress (Stressed plants); 0OS - Application of Se on the day of stress occurrence (Stressed plants); +4AOS - Application of Se 4 days after stress (Stressed plants); +8AOS - Application of Se 8 days after stress (Stressed plants); +OS-Se - Without Se (Stressed plants); -OS-Se - Without Se (Non-stressed plants).

## Running Title

| Variables | i) Contributions of all variables |        |        |        | Variables | ii) Contributions of reduced number of variables |        |        |        |
|-----------|-----------------------------------|--------|--------|--------|-----------|--------------------------------------------------|--------|--------|--------|
|           | PC1                               | PC2    | PC3    | PC4    |           | PC1                                              | PC2    | PC3    | PC4    |
| PL        | 7.335                             | 0.739  | 10.392 | 7.945  | PL        | 7.064                                            | 30.181 | 4.701  | 3.123  |
| PH        | 9.152                             | 0.327  | 1.796  | 1.335  | PH        | -                                                | -      | -      | -      |
| APX       | 8.232                             | 5.634  | 3.123  | 4.584  | APX       | 17.959                                           | 0.142  | 0.501  | 4.211  |
| CAT       | 3.630                             | 2.789  | 18.581 | 0.003  | CAT       | 10.394                                           | 19.244 | 0.948  | 23.059 |
| GR        | 3.028                             | 7.442  | 8.588  | 4.391  | GR        | 12.638                                           | 15.202 | 0.529  | 0.233  |
| SOD       | 3.646                             | 14.082 | 0.767  | 0.082  | SOD       | 16.491                                           | 0.950  | 7.555  | 22.579 |
| RS        | 2.700                             | 0.267  | 0.016  | 21.803 | RS        | -                                                | -      | -      | -      |
| AA        | 1.567                             | 0.003  | 10.418 | 5.192  | AA        | -                                                | -      | -      | -      |
| Pro       | 11.854                            | 0.405  | 8.790  | 0.526  | Pro       | 5.343                                            | 20.702 | 22.985 | 6.861  |
| TSS       | 3.719                             | 0.001  | 9.315  | 13.493 | TSS       | -                                                | -      | -      | -      |
| Starch    | 9.582                             | 1.860  | 1.278  | 2.334  | Starch    | 14.069                                           | 0.245  | 2.407  | 20.424 |
| Prt       | 0.432                             | 0.007  | 3.170  | 10.096 | Prt       | 0.505                                            | 12.252 | 48.321 | 13.277 |
| Sac       | 0.092                             | 0.051  | 6.206  | 18.417 | Sac       | -                                                | -      | -      | -      |
| Se        | 11.420                            | 1.475  | 0.534  | 0.403  | Se        | 15.536                                           | 1.081  | 12.053 | 6.231  |
| ECSt      | 0.132                             | 0.196  | 0.536  | 1.079  | ECSt      | -                                                | -      | -      | -      |
| LEF       | 3.474                             | 4.826  | 3.183  | 4.346  | LEF       | -                                                | -      | -      | -      |
| NPQt      | 3.443                             | 13.771 | 4.769  | 0.419  | NPQt      | -                                                | -      | -      | -      |
| Phi2      | 1.225                             | 15.843 | 1.842  | 0.002  | Phi2      | -                                                | -      | -      | -      |
| PhiNO     | 5.915                             | 10.830 | 3.444  | 0.195  | PhiNO     | -                                                | -      | -      | -      |
| PhiNPQ    | 1.193                             | 16.279 | 3.247  | 0.246  | PhiNPQ    | -                                                | -      | -      | -      |
| qL        | 8.229                             | 3.174  | 0.003  | 3.108  | qL        | -                                                | -      | -      | -      |

Supplementary Table S1: Contributions on the first two PC axes of i) all variables and ii) reduced number of variables.

Running Title

Supplementary Figure S6. Correlation matrix showing Pearson’s correlation of physiological, biochemical, and nutritional parameters of *Coffea arabica* seedlings. The leaf attributes were Leaf Se content (Se); Ascorbate peroxidase (APX); Super-oxide Dismutase (SOD), Catalase (CAT), Glutathione Reductase (GR); Proline; Protein; Lipid Peroxidation (MDA), and Starch.

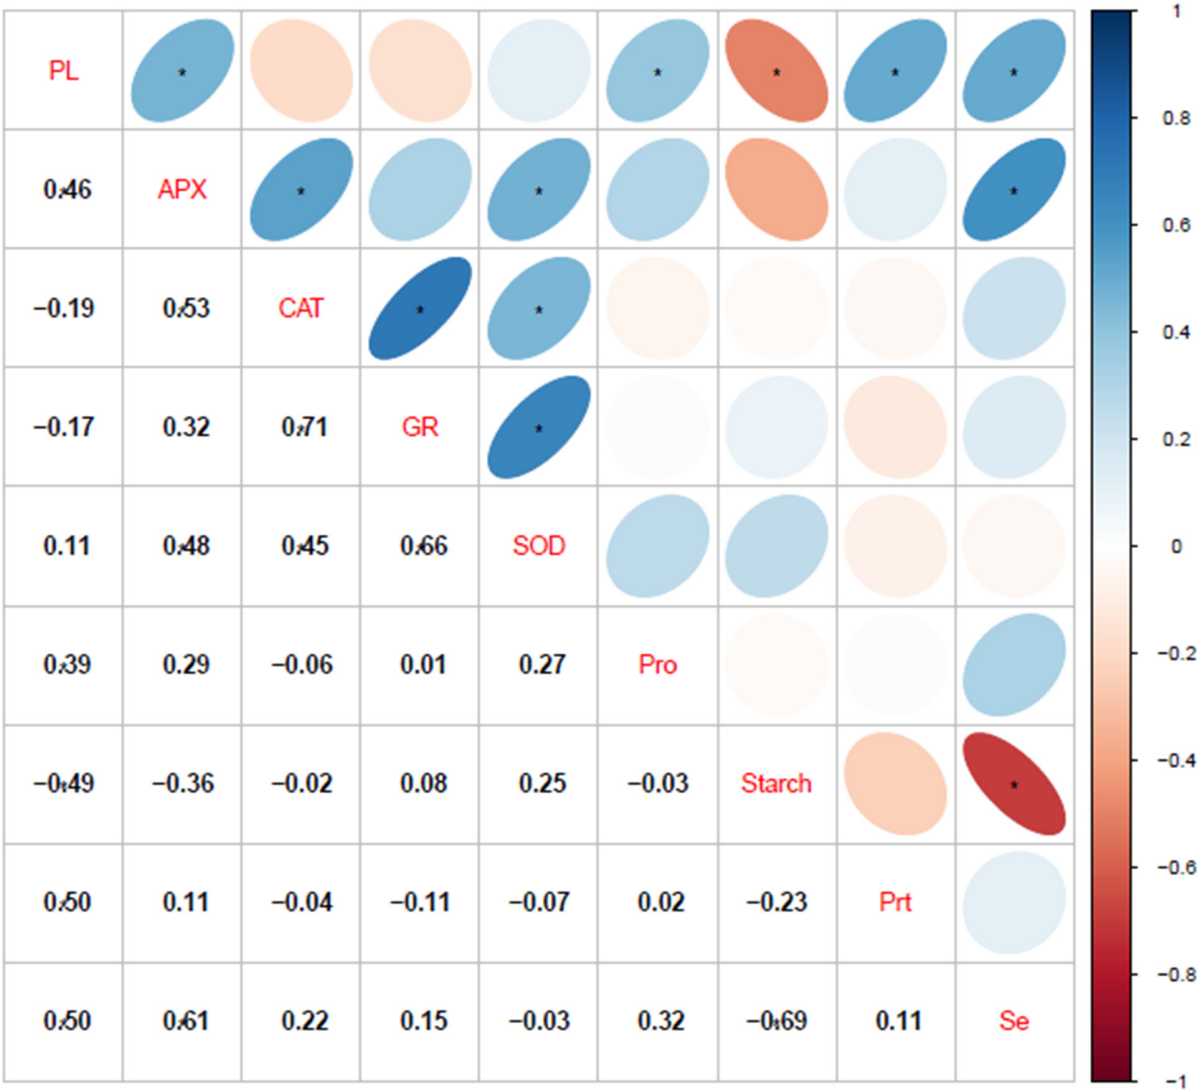

Supplement: s1 [file s1]
